# Supplementary material for: Marker Assisted Selection of Malic-Consuming Saccharomyces cerevisiae Strains for Winemaking. Efficiency and Limits of a QTL’s Driven Breeding Program
Source: Preprints.org preprint supplement (doi:10.20944/preprints202103.0132.v1), 2021-03-03
Supplement: Supplementary file 1 [file supplementary]

## Sheet: Feuil1
SNP ID	Chromosome	Genomic position	malic consuming SNP	REF	GN	SB	M2	F15	Sequence (50 bp flanking from the SNP)	2nd-PCRP	1st-PCRP	AMP_LEN	UP_CONF	MP_CONF	Tm(NN)	PcGC	UEP_DIR	UEP_MASS	UEP_SEQ	EXT1_CALL	EXT1_MASS	EXT1_SEQ	EXT2_CALL	EXT2_MASS	EXT2_SEQ
II_661	chr2	661133	g.661133G>T	G	G	T	G	G	ACCATTACCACCGGCAGAACGATAGACCTCCAGGCGACCGGTATCCGGTT[G/T]GAAATTCTTAGAGGGATCTTCAGTGGTAATACGACATTGGATGGAAAACC	ACGTTGGATGCCACTGAAGATCCCTCTAAG	ACGTTGGATGACCATTACCACCGGCAGAAC	97	98.5	72.1	48.6	39.1	R	6982.6	CTGAAGATCCCTCTAAGAATTTC	G	7229.8	CTGAAGATCCCTCTAAGAATTTCC	T	7253.8	CTGAAGATCCCTCTAAGAATTTCA
IV_31	chr4	31151	g.31151A>C	A	A	C	A	A	TGAAAAGATCCTAGCTGTGGGTCATAATGAAGCGTATTTGGACCCAGTTGA[C/A]TTGACATTAGACAAGCTATACACTGGCCCCCTCTTGGAGATTTTAGACGAG	ACGTTGGATGGAAAAGATCCTAGCTGTGGG	ACGTTGGATGGGGCCAGTGTATAGCTTGTC	100	98.6	72.1	55.6	47.8	F	7746.0	agGAAGCGTATTTGGACCCAGTTGA	C	7993.2	agGAAGCGTATTTGGACCCAGTTGAC	A	8017.3	agGAAGCGTATTTGGACCCAGTTGAA
IV_360	chr4	360451	g.360451G	G	G	A	G	G	GAGGGGCCCAAGTGATAACAAAATTGATACCGCTAGGATATATGTCACAG[G/A]ATCACTAAAGATCCTTAGCATCGTCTGCGTAAACTTTTCTTGAACATGAT	ACGTTGGATGGGGCCCAAGTGATAACAAAA	ACGTTGGATGTTACGCAGACGATGCTAAGG	100	96.1	72.1	51.6	45.5	F	6743.4	ACCGCTAGGATATATGTCACAG	A	7014.6	ACCGCTAGGATATATGTCACAGA	G	7030.6	ACCGCTAGGATATATGTCACAGG
IV_414	chr4	414194	g.414194T>C	T	T	C	T	T	ATTGGTTACACCTCACGTTTAATTAGGACCCAACAGACCATAGAAACGA[T/C]GTGTGAAGAATTTAAGTTAAAGCCACAACTGCAGGTTGTTTACGACTTYA	ACGTTGGATGTAGGACCCAACAGACCATAG	ACGTTGGATGGTAAACAACCTGCAGTTGTG	90	98.2	72.1	50.0	45.0	F	6097.0	CCAACAGACCATAGAAACGA	C	6344.2	CCAACAGACCATAGAAACGAC	T	6424.1	CCAACAGACCATAGAAACGAT
VII_427	chr7	427894	g.427894A>G	A	A	G	A	A	AAATCCGAGATAGGATTGATTAATTCCTCACCTTTTGGAACAGTCAAGGA[A/G]CCTAAAGGTGAAATAAAATCATTTTGCATATCAACAACAATTAAAGTCTT	ACGTTGGATGCAGTCAAGAAACCCTTGTCG	ACGTTGGATGCTGGGGTAGTCAATTGGTTG	103	95.6	72.1	47.3	34.8	F	7286.8	cCAATCTTAATATGCTTAGTGACC	A	7558.0	cCAATCTTAATATGCTTAGTGACCA	G	7574.0	cCAATCTTAATATGCTTAGTGACCG
VII_480	chr7	480044	g.480044G	G	G	C	G	G	TCTGGATCTGGTCTATCGGTATCTTCTGTGTTTTGGGTGGTTTCTACTAC[G/C]AAATGTCCACTTCTGAAGCCTTTGACAGATTGATGAACGGTAAGCCAATG	ACGTTGGATGGGATCTGGTCTATCGGTATC	ACGTTGGATGGTCAAAGGCTTCAGAAGTGG	94	99.9	72.1	45.1	47.1	F	5207.4	TGGGTGGTTTCTACTAC	C	5454.6	TGGGTGGTTTCTACTACC	G	5494.6	TGGGTGGTTTCTACTACG
XI_382	chr11	382913	g.382913T>C	T	C	T	T	C	TACTTGTTCTTGCTCGATACGGGCGGTTCCCTCCTCGAGTGCTTGCAAGA[T/C]CACAGCGGTAGCTAGACGCGCAGARGTGTTGGTGATGGTGTCCAGGCCGG	ACGTTGGATGTTGTTCTTGCTCGATACGGG	ACGTTGGATGCTGGACACCATCACCAACAC	113	97.9	72.1	46.4	53.3	F	4617.0	CGAGTGCTTGCAAGA	C	4864.2	CGAGTGCTTGCAAGAC	T	4944.1	CGAGTGCTTGCAAGAT
XI_631	chr11	631332	g.631332A>G	A	A	G	A	A	TGAAGATGGTCTAAAAGAAAATAAAACTGTCATTTCATCAAGCGGTGCATTG[A/G]TCGCTTATTCCGGTGTTAAAACCGGAAGATCTCCAAAGGACAAACGTA	ACGTTGGATGTGTCCTTTGGAGATCTTCCG	ACGTTGGATGACTGTCATTTCATCAAGCGG	90	98.2	72.1	45.4	53.3	R	4595.0	CACCGGAATAAGCGA	G	4842.2	CACCGGAATAAGCGAC	A	4922.1	CACCGGAATAAGCGAT
XII_53	chr12	53460	g.53460T>C	T	T	C	T	T	ATCCAGTTTCTTACGATCTTCAATACTTTGTAGCACTTCCGTTCCATCCT[T/C]TGGAAACGATGATCTCTGTAAGTAAGGTTGGATAGATTTGTATTGTTGGT	ACGTTGGATGACTTTGTAGCACTTCCGTTC	ACGTTGGATGCTATCCAACCTTACTTACAG	82	91.8	72.1	48.9	52.9	F	5032.3	CACTTCCGTTCCATCCT	C	5279.5	CACTTCCGTTCCATCCTC	T	5359.4	CACTTCCGTTCCATCCTT
XV_491	chr15	491585	g.491585C	C	T	C	T	T	GCAATTTCTTCATTAGTTAGTAATTCGAATAAACSATCCGAACCCATCAC[C/T]ATAAATTTAGTGTTCTCACCAATTTTGGCAGAAGTAATCACTGGTTCCGC	ACGTTGGATGGCGGAACCAGTGATTACTTC	ACGTTGGATGCTTCATTAGTTAGTAATTCG	114	78.7	72.1	47.3	25.0	R	7398.9	AATTGGTGAGAACACTAAATTTAT	T	7670.1	AATTGGTGAGAACACTAAATTTATA	C	7686.1	AATTGGTGAGAACACTAAATTTATG
XV_1052	chr15	1052746	g.1052746G	G	G	A	A	G	TGCTACTGCCATGAAAACGTTAGATAATATTACTCAAATTCTCGGTACAC[G/A]TATTGCTTTTGAAGCACAAAAGACCGCAAAACTGCTTCTTGAGGATTCCA	ACGTTGGATGCAAGAAGCAGTTTTGCGGTC	ACGTTGGATGTGCTACTGCCATGAAAACG	112	97.3	72.1	46.2	31.6	R	5810.8	TTGTGCTTCAAAAGCAATA	G	6058.0	TTGTGCTTCAAAAGCAATAC	A	6137.9	TTGTGCTTCAAAAGCAATAT
