# Supplementary material for: Marker Assisted Selection of Malic-Consuming Saccharomyces cerevisiae Strains for Winemaking. Efficiency and Limits of a QTL’s Driven Breeding Program
Source: Preprints.org preprint supplement (doi:10.20944/preprints202103.0132.v1), 2021-03-03
Supplement: Supplementary file 3 [file Table S2.xlsx]

## Sheet: Feuil1
	Must	Fermenting sugar (g/L)	L-malic acid (g/L)	Amino acids itrogen (mg/L)	Ammonia nitrogen (mg/L)	Assimilable nitrogen (mg/L)	pH
Media 1	M15	219	4.11	246	54	300	3.4
Media 2	M15	219	4.11	123	27	150	3.32
Media 3	M15	219	2.28	246	54	300	3.66
Media 4	M15	219	2.28	123	27	150	3.54
Media 5	M15	219	2.99	246	54	300	3.56
Media 6	M15	219	2.99	123	27	150	3.48
Media 7	SB16	201	9.39	240	60	300	3
Media 8	SB16	201	9.39	120	30	150	2.94
Media 9	SB16	201	5.6	240	60	300	3.26
Media 10	SB16	201	5.6	120	30	150	3.19
Media 11	SB16	201	7.65	240	60	300	3.15
Media 12	SB16	201	7.65	120	30	150	3.1
