# Supplementary material for: Marker Assisted Selection of Malic-Consuming Saccharomyces cerevisiae Strains for Winemaking. Efficiency and Limits of a QTL’s Driven Breeding Program
Source: Preprints.org preprint supplement (doi:10.20944/preprints202103.0132.v1), 2021-03-03
Supplement: Supplementary file 4 [file Table S3.xlsx]

## Sheet: Peltier 2018 data starters
Must	CS15	M14	M15	SB14	SB15	Average
MIN	20.0457	35.6737	3.52582	51.2486	42.1148	30.5217
MAX	49.056	57.5988	39.8603	60.4732	58.1908	53.0358
F15	37.237	49.3769	20.0415	55.1326	48.0376	41.9651
GN	20.0457	35.6737	3.52582	52.7051	42.9609	30.9823
M2	30.7902	50.2905	21.693	56.1037	46.3454	41.0445
SB	40.4603	57.5988	34.9056	57.5602	49.7298	48.0509
C1	39.3859	51.204	28.2993	55.1326	48.0376	44.4119
C10	37.237	47.5498	31.6024	55.6181	48.0376	44.009
C11	43.6837	53.0311	34.9056	59.0167	51.422	48.4118
C12	36.1625	51.204	23.3446	56.1037	48.8837	43.1397
C13	39.3859	52.1175	28.2993	58.0457	58.1908	47.2078
C14	39.3859	47.5498	28.2993	60.4732	47.1915	44.5799
C15	35.0881	45.7227	23.3446	53.6761	53.1142	42.1891
C16	35.0881	47.5498	24.9962	57.0747	44.6531	41.8724
C17	32.9391	48.4634	20.0415	51.2486	47.1915	39.9768
C18	40.4603	53.9446	24.9962	57.0747	52.2681	45.7488
C19	34.0136	45.7227	26.6477	57.5602	45.4992	41.8887
C2	31.8647	52.1175	16.7383	54.6471	43.807	39.835
C20	44.7582	50.2905	28.2993	58.5312	48.8837	46.1526
C21	28.6413	46.6363	15.0868	54.1616	42.9609	37.4974
C22	31.8647	48.4634	21.693	53.1906	42.1148	39.4653
C23	35.0881	50.2905	28.2993	59.0167	44.6531	43.4695
C24	32.9391	45.7227	21.693	54.1616	45.4992	40.0032
C25	49.056	52.1175	28.2993	54.6471	48.8837	46.6007
C26	29.7158	43.8956	20.0415	56.1037	44.6531	38.8819
C27	32.9391	47.5498	20.0415	56.1037	49.7298	41.2728
C28	32.9391	47.5498	20.0415	54.6471	46.3454	40.3046
C29	37.237	51.204	28.2993	57.0747	46.3454	44.0321
C3	29.7158	46.6363	20.0415	53.1906	NA	37.396
C30	34.0136	48.4634	28.2993	52.2196	43.807	41.3606
C31	34.0136	46.6363	16.7383	53.1906	43.807	38.8772
C4	44.7582	57.5988	39.8603	57.5602	46.3454	49.2246
C5	37.237	48.4634	24.9962	54.1616	48.8837	42.7484
C6	26.4924	43.8956	18.3899	54.1616	42.9609	37.1801
C7	32.9391	47.5498	28.2993	52.2196	48.8837	41.9783
C8	37.237	43.8956	31.6024	55.1326	47.1915	43.0118
C9	37.237	46.6363	28.2993	57.5602	49.7298	43.8925
data computed from Peltier et al 2018 PlosOne

## Sheet: M2xF15 progeny value in M15
Strain	MAC
FMA1	31.87
FMA10	20.26
FMA11	-4.61
FMA12	13.62
FMA2	31.87
FMA3	23.58
FMA4	18.60
FMA5	20.26
FMA6	11.96
FMA7	16.94
FMA8	18.60
FMA9	10.31
FMB1	50.12
FMB10	2.01
FMB11	36.85
FMB12	28.55
FMB2	3.67
FMB3	45.14
FMB4	8.65
FMB5	6.99
FMB6	25.23
FMB7	18.60
FMB8	-14.57
FMB9	18.60
FMC1	-7.93
FMC10	20.26
FMC11	23.58
FMC12	28.55
FMC2	33.53
FMC3	-6.27
FMC4	10.31
FMC5	28.55
FMC6	31.87
FMC7	18.60
FMC8	21.92
FMC9	11.96
FMD1	28.55
FMD10	13.62
FMD11	13.62
FMD12	0.35
FMD2	0.35
FMD3	8.65
FMD4	23.58
FMD5	33.53
FMD6	15.28
FMD7	3.67
FMD8	45.44
FMD9	20.26
FME1	18.60
FME10	23.58
FME11	35.19
FME12	13.62
FME2	23.58
FME3	21.92
FME4	28.55
FME5	33.53
FME6	16.94
FME7	18.60
FME8	43.48
FME9	28.55
FMF1	30.21
FMF10	2.01
FMF11	5.30
FMF12	21.92
FMF2	11.96
FMF3	15.28
FMF4	28.55
FMF5	13.62
FMF6	28.55
FMF8	11.96
FMF9	5.33
FMG1	8.65
FMG10	6.99
FMG11	16.94
FMG12	21.92
FMG2	18.60
FMG3	11.96
FMG4	10.31
FMG5	23.58
FMG6	20.26
FMG7	25.24
FMG8	6.99
FMG9	28.55
FMH1	11.96
FMH10	33.53
FMH11	21.92
FMH12	18.60
FMH2	5.33
FMH3	23.58
FMH4	11.96
FMH5	6.99
FMH6	18.60
FMH7	-1.30
FMH8	18.60
FMH9	3.67
