# Supplementary material for: Marker Assisted Selection of Malic-Consuming Saccharomyces cerevisiae Strains for Winemaking. Efficiency and Limits of a QTL’s Driven Breeding Program
Source: Preprints.org preprint supplement (doi:10.20944/preprints202103.0132.v1), 2021-03-03
Supplement: Supplementary file 5 [file Table S6.xlsx]

## Sheet: Results_ANOVA
	Strain		Must		Temperature		Malic_acid		Nitrogen		Residuals
	%	p-value	%	p-value	%	p-value	%	p-value	%	p-value	%	p-value
ALL	26.6	***	55.2	***	0.2		1.0	**	3.6	***	13.4	-
M15	74.8	***	-	-	-	-	0.9	.	7.9	***	16.3	-
SB16	60.5	***	-	-	-	-	11.8	***	13.8	***	13.8	-
Signif. codes: 0 ‘***’ 0.001 ‘**’ 0.01 ‘*’ 0.05 ‘.’ 0.1 ‘ ’ 1
